# Supplementary material for: Newborn Screening for the Detection of the TP53 R337H Variant and Surveillance for Early Diagnosis of Pediatric Adrenocortical Tumors: Lessons Learned and Way Forward
Source: MDPI journal article supplement (doi:10.3390/cancers13236111), 2021-12-03
Supplement: s1 [file s1]

# Newborn Screening for the Detection of the *TP53* R337H Variant and Surveillance for Early Diagnosis of Pediatric Adrenocortical Tumors: Lessons Learned and Way Forward

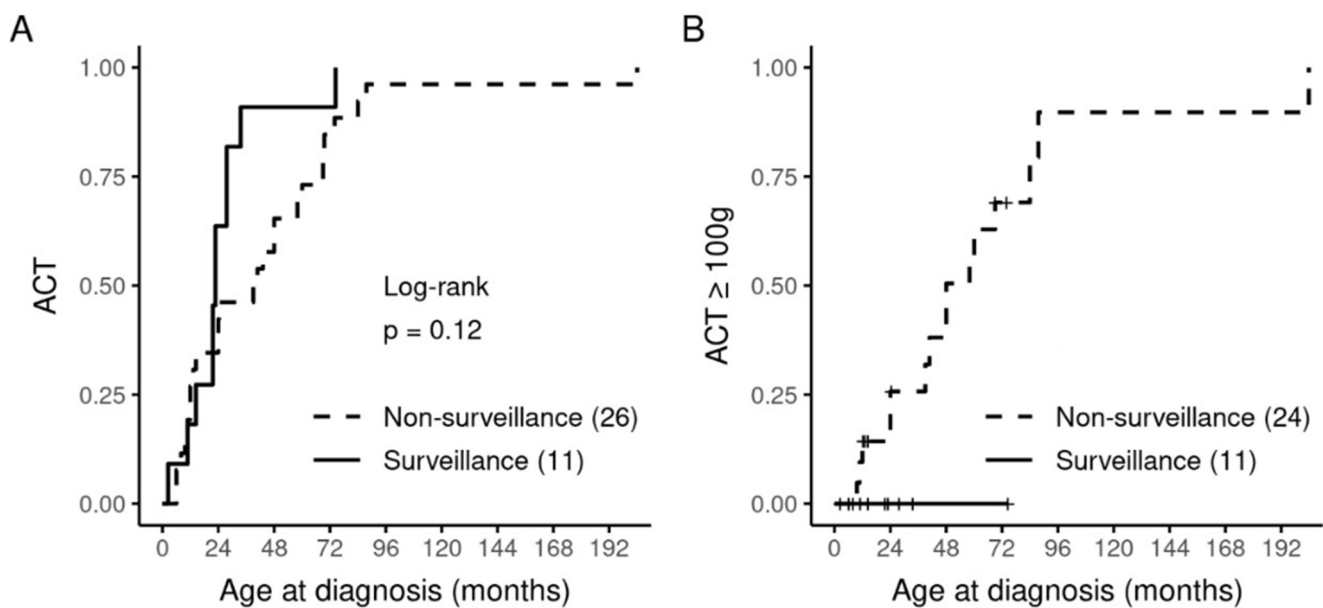

**Figure S1.** (A) There is no significant difference between age at diagnosis of pediatric ACT according to participation in the surveillance. (B) Age at diagnosis is strongly associated with tumor weight. The number of children with tumor weight < 100 g is significantly higher in the surveillance group than that of children who did not participate in the surveillance.

**Table S1.** Features at diagnosis of children with ACT in newborn screening, but not surveillance.

| Neonatal Screening | Age (Years) | Stage          | Interval Between Symptoms and Diagnosis (weeks) | Tumor Weight (g) | Treatment              |
|--------------------|-------------|----------------|-------------------------------------------------|------------------|------------------------|
| 1                  | 0.5         | I              | NA                                              | 40               | Surgery                |
| 2                  | 0.9         | II             | NA                                              | 160              | Surgery                |
| 3                  | 0.8         | II             | NA                                              | 580              | Surgery + Chemotherapy |
| 4                  | 0.5         | I              | NA                                              | 65               | Surgery                |
| 5                  | 1.2         | III (spillage) | NA                                              | 90               | Surgery + Chemotherapy |
| 6                  | 1.1         | I              | NA                                              | 60               | Surgery                |
| 7                  | 3.6         | III            | NA                                              | NA               | Surgery + Chemotherapy |
| 8                  | 3.4         | III            | NA                                              | 780              | Surgery + Chemotherapy |
| 9                  | 7.3         | II             | NA                                              | 267              | Surgery                |
| 10                 | 5.8         | IV             | NA                                              | NA               | Unknown                |
| Median             | 1.2         | NA             | NA                                              | 125              | -                      |

**Table S2.** Analysis of tumor weight according to newborn screening and surveillance.

| Tumor Weight (g)     | No Newborn Screening or Surveillance<br>(N = 16) | Newborn Screening and No Surveillance<br>(N = 10) | Newborn Screening and Surveillance<br>(N = 11) | p-Value <sup>‡</sup> |
|----------------------|--------------------------------------------------|---------------------------------------------------|------------------------------------------------|----------------------|
| <55                  | 5 (31.5%)                                        | 4 (40%)                                           | 11 (100%)                                      | 0.0005 <sup>†</sup>  |
| ≥100                 | 11 (68.5%)                                       | 6 (60%) <sup>*</sup>                              | 0                                              |                      |
| Median and range (g) | 210 (18–608)                                     | 125 (40–780)                                      | 21 (1–54)                                      | 0.0002 <sup>‡</sup>  |

<sup>\*</sup> Tumor weight was not available but estimated to be greater than 100 g by imaging studies. <sup>‡</sup> The newborn screening and surveillance groups were used as a reference. Data from the other two groups were combined for the analysis. <sup>†</sup> Fisher's exact test. <sup>‡</sup> Kruskal–Wallis test.

**Table S3.** Analysis of disease stage according to newborn screening and surveillance.

| Disease Stage | No Newborn Screening or Surveillance<br>(N = 16) | Newborn Screening and No Surveillance<br>(N = 10) | Newborn Screening and Surveillance<br>(N = 11) | p-Value <sup>‡</sup> |
|---------------|--------------------------------------------------|---------------------------------------------------|------------------------------------------------|----------------------|
| I             | 5 (31.5%)                                        | 3 (30%)                                           | 11 (100%)                                      | 0.0008 <sup>†</sup>  |
| II–III        | 6 (37.0%)                                        | 6 (60%)                                           | 0                                              |                      |
| IV            | 5 (31.5%)                                        | 1 (10%)                                           | 0                                              |                      |

<sup>‡</sup> The newborn screening and surveillance groups were used as a reference. Data from the other two groups were combined for the analysis. <sup>†</sup> Fisher's exact test.

**Table S4.** Analysis of duration of symptoms according to newborn screening and surveillance.

| Duration of Symptoms     | No newborn Screening or Surveillance<br>(N = 16) | Newborn Screening and Surveillance<br>(N = 11) | p-Value <sup>‡</sup>    |
|--------------------------|--------------------------------------------------|------------------------------------------------|-------------------------|
| Median and range (weeks) | 17 (3–52)                                        | 3 (3–3)                                        | 0.00001962 <sup>‡</sup> |

<sup>‡</sup> The newborn screening and surveillance groups were used as a reference. There is no available data on the duration of symptoms in children who refused surveillance. <sup>‡</sup> Kruskal–Wallis test.

**Table S5.** Cost with chemotherapy or surgery for patients with advanced-stage disease.

| Patient | Disease Stage | Sites             | Expenditures per Year from Diagnosis, in US Dollars |        |      |      |      |      |      |      |      |      | Status |
|---------|---------------|-------------------|-----------------------------------------------------|--------|------|------|------|------|------|------|------|------|--------|
|         |               |                   | 1st                                                 | 2nd    | 3rd  | 4th  | 5th  | 6th  | 7th  | 8th  | 9th  | 10th |        |
| 1       | IV            | liver             | 11,289                                              | 11,927 | 6035 | 169  |      |      |      |      |      |      | Dead   |
| 2       | IV            | Lung, liver, bone | 6134                                                |        |      |      |      |      |      |      |      |      | Dead   |
| 3       | IV            | Lung              | 14,852                                              | 5967   | 332  | 85   | 12   |      |      |      |      |      | A, NED |
| 4       | II/IV         | Lung              | 3208                                                | 4708   | 9900 | 5887 | 168  |      |      |      |      |      | Dead   |
| 5       | IV            | Lung              | 10,758                                              | 7534   | 1297 | 3409 | 2689 | 587  | 587  | 28   | 82   | 8.47 | A, NED |
| 6       | III           |                   | 11,928                                              |        |      |      |      |      |      |      |      |      | Dead   |
| 7       | II/III        |                   | 645                                                 | 314    | 2768 | 4310 | 2898 | 326  | 173  | 83   | 83   |      | A, NED |
| 8       | III           |                   | 7584                                                | 2009   | 193  | 5404 | 4890 | 5282 | 8021 | 4454 | 8955 | 322  | A, NED |

A, alive; NED, no evidence of disease.
